# Supplementary material
Source: Springer Nature journal article supplement (https://www.springerprofessional.de/resource/supplementary/13638_2014_959_MOESM2_ESM.pdf/11898850)

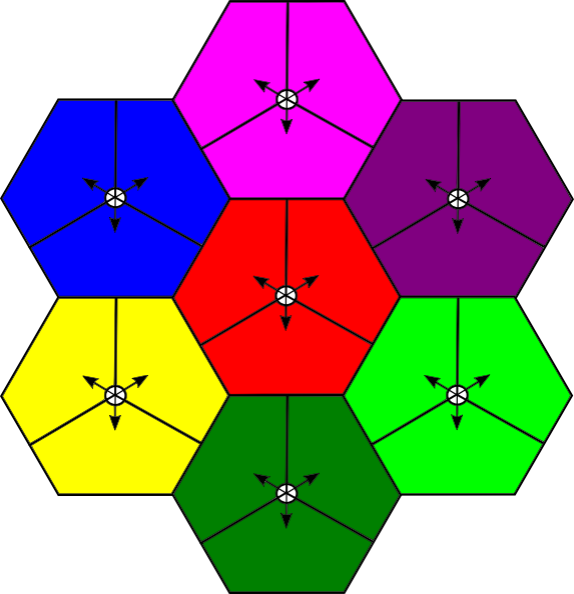

Supplement: MOESM2 [file 11898850]
